# Supplementary material for: Perturbation of Copper Homeostasis Sensitizes Cancer Cells to Elevated Temperature
Source: MDPI journal article supplement (doi:10.3390/ijms25010423), 2023-12-28

Enriched from unique DEGs

Leading edge analysis

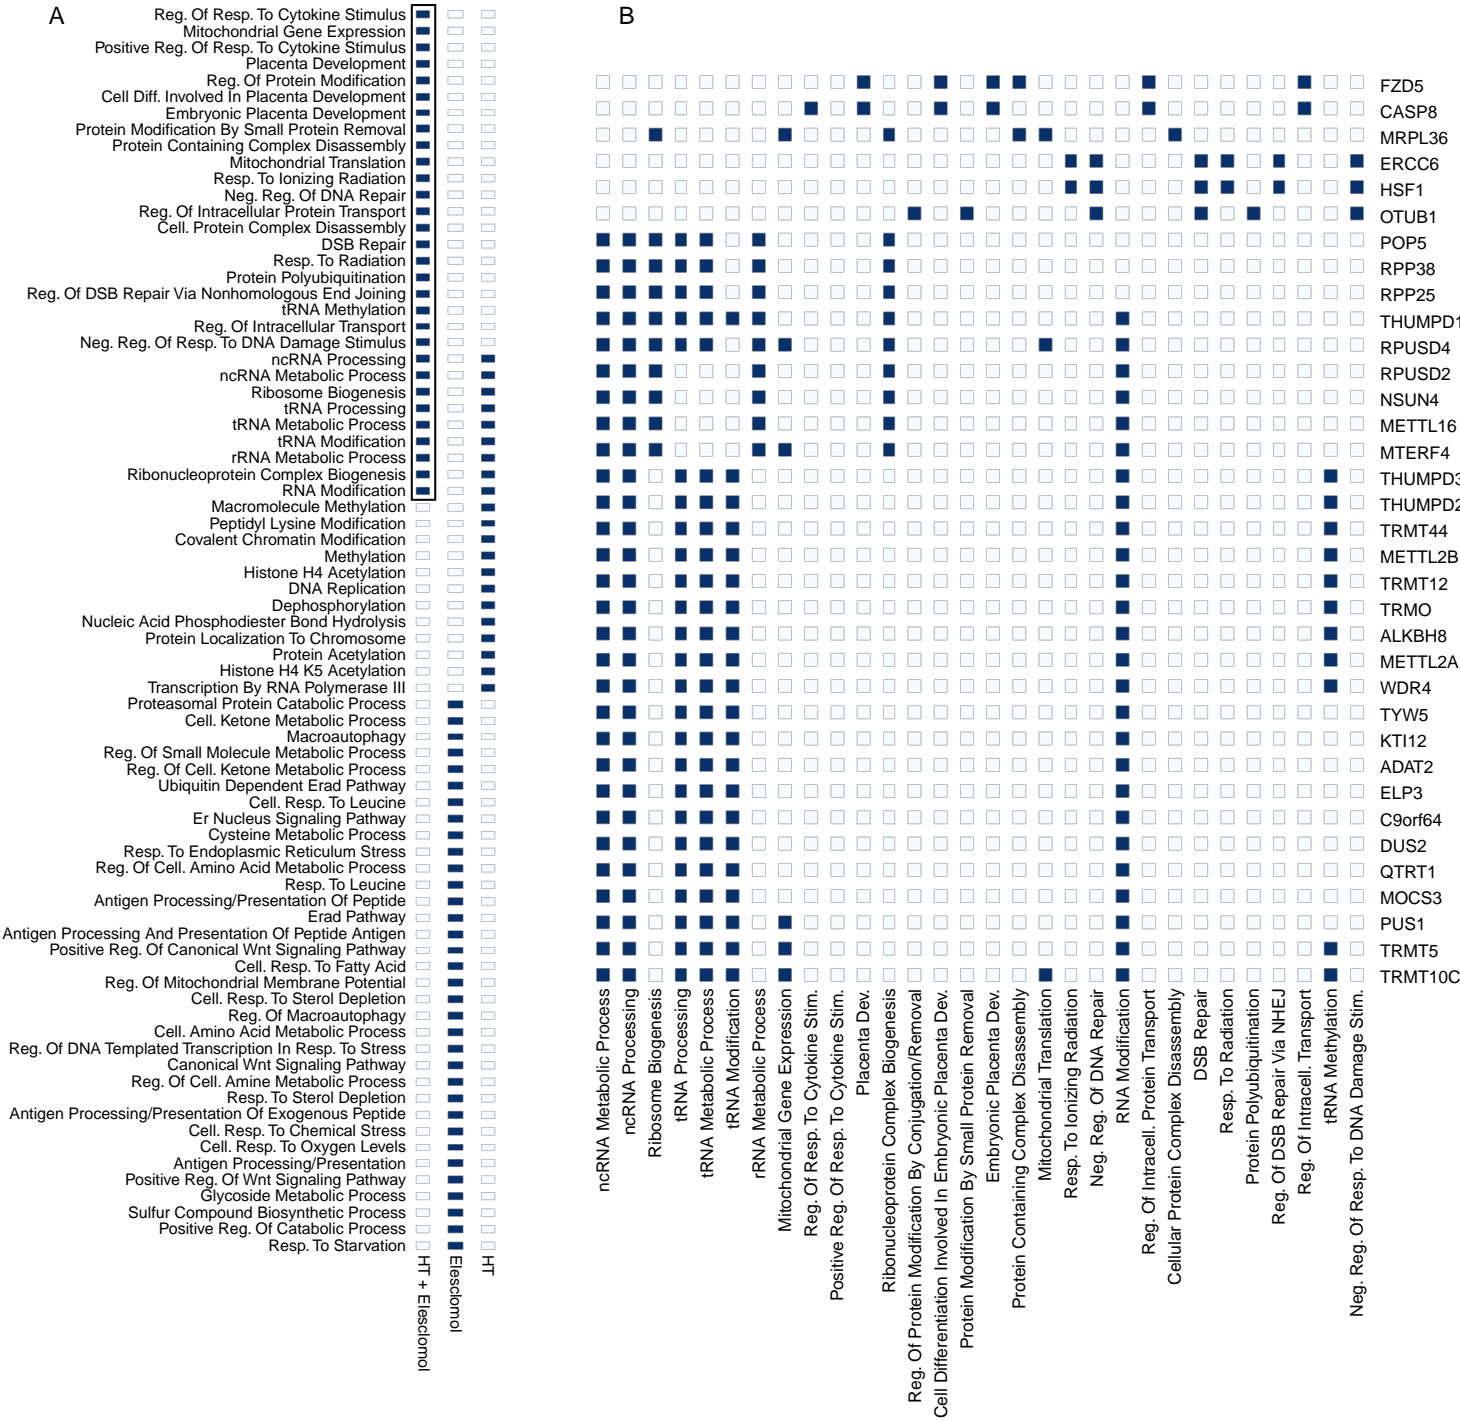

Leading edge genes

Enrichment of ncRNA/tRNA related GO:BP

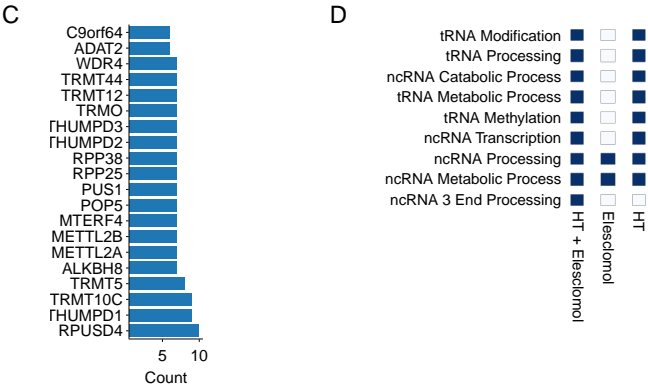

Supplement: s1 [file s1]
