# Supplementary figures and images for: Perturbation of Copper Homeostasis Sensitizes Cancer Cells to Elevated Temperature
Source: MDPI journal article supplement (doi:10.3390/ijms25010423), 2023-12-28

A

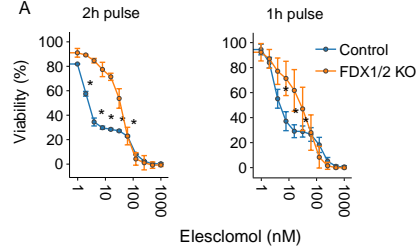

Supplement: s1 [file s1]

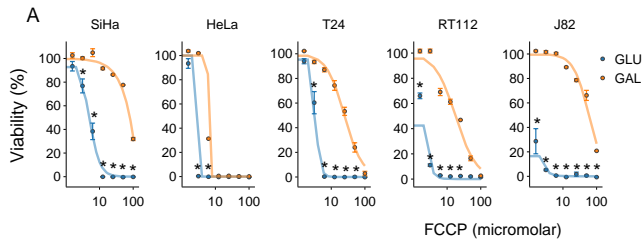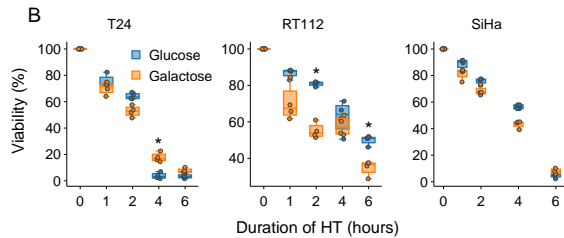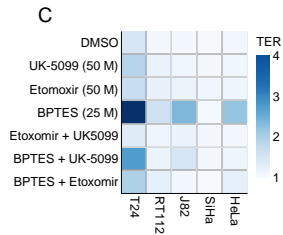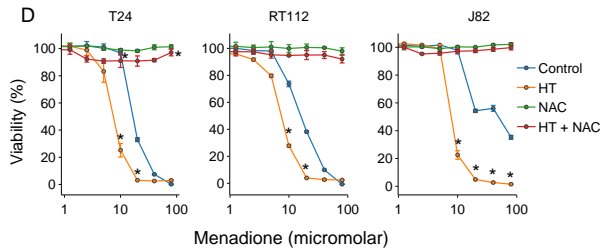

Supplement: s1 [file s1]

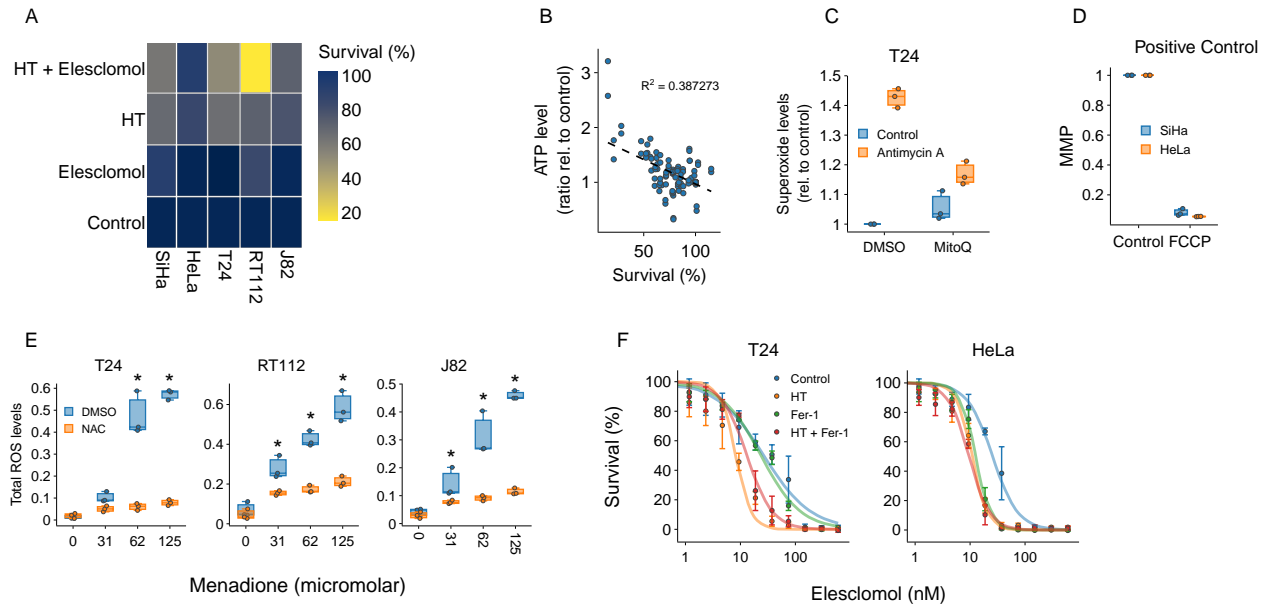

Supplement: s1 [file s1]

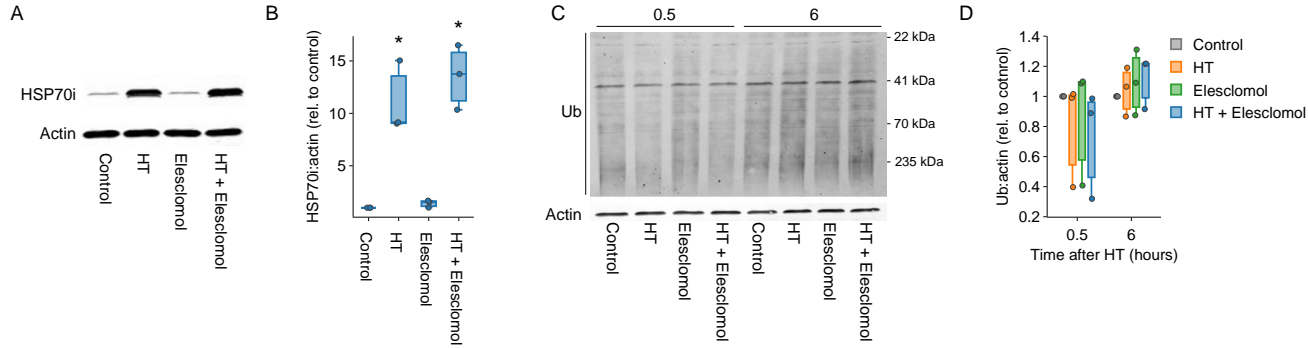

Supplement: s1 [file s1]

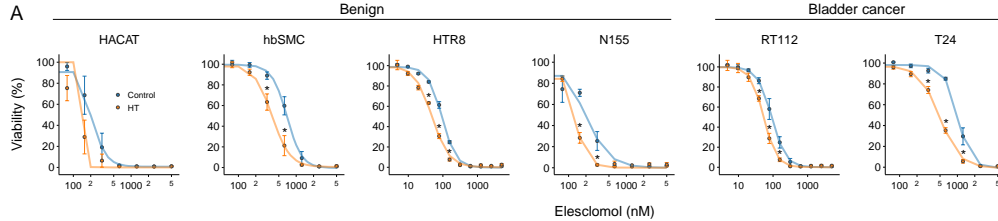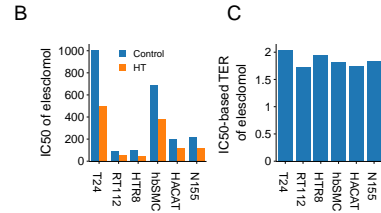

Supplement: s1 [file s1]
